# Supplementary material for: Promoter Usage and Dynamics in Vascular Smooth Muscle Cells Exposed to Fibroblast Growth Factor-2 or Interleukin-1β
Source: PubMed Central journal article supplement (PMC6120868; doi:10.1038/s41598-018-30702-4), 2018-09-03

## Supplementary Information

### **Promoter Usage and Dynamics in Vascular Smooth Muscle Cells Exposed to Fibroblast Growth Factor-2 or Interleukin-1 $\beta$**

Ahmad M. N. Alhendi, Margaret Patrikakis, Carsten O. Daub, Hideya Kawaji, Masayoshi Itoh, Michiel de Hoon, Piero Carninci, Yoshihide Hayashizaki, Erik Arner, Levon M. Khachigian

#### **Supplementary Figure Legend**

**Supplementary Figure 1. p1@EGR-1 and p2@EGR-1 CAGE in SMC exposed to FGF2 or IL-1 $\beta$ .** Growth quiescent SMC were exposed to FGF2 (50 ng/ml) or IL-1 $\beta$  (10 ng/ml) for various times up to 6 h. Fold change CAGE data for p1@EGR-1 (**A, C**) and p2@EGR-1 (**B, D**) sourced from Ref <sup>12</sup>. Samples at 0 min represent serum starved, unstimulated samples. Significance was determined using edgeR software in Ref <sup>12</sup>. Error bars represent SEM.

#### **Supplementary Table Legends**

**Supplementary Table 1. Promoters regulated in SMC by FGF2 and/or IL-1 $\beta$ .** These promoters are differentially expressed significantly (5% FDR threshold by edgeR software) in at least one of all pairwise comparisons of all time points up to and including 6 h.

**Supplementary Table 2. Dynamic clustering of TF expression in SMC exposed to FGF2 or IL-1 $\beta$ .**

**Supplementary Table 3. Motifs associated with dynamic clustering in SMC exposed to (A) FGF2 or (B) IL-1 $\beta$ .**

**Supplementary Table 4. Samples passing quality control analysed in this study.**

## Promoter Usage and Dynamics in Vascular Smooth Muscle Cells Exposed to Fibroblast Growth Factor-2 or Interleukin-1 $\beta$

Ahmad M. N. Alhendi, Margaret Patrikakis, Carsten O. Daub, Hideya Kawaji, Masayoshi Itoh, Michiel de Hoon, Piero Carninci, Yoshihide Hayashizaki, Erik Arner, Levon M. Khachigian

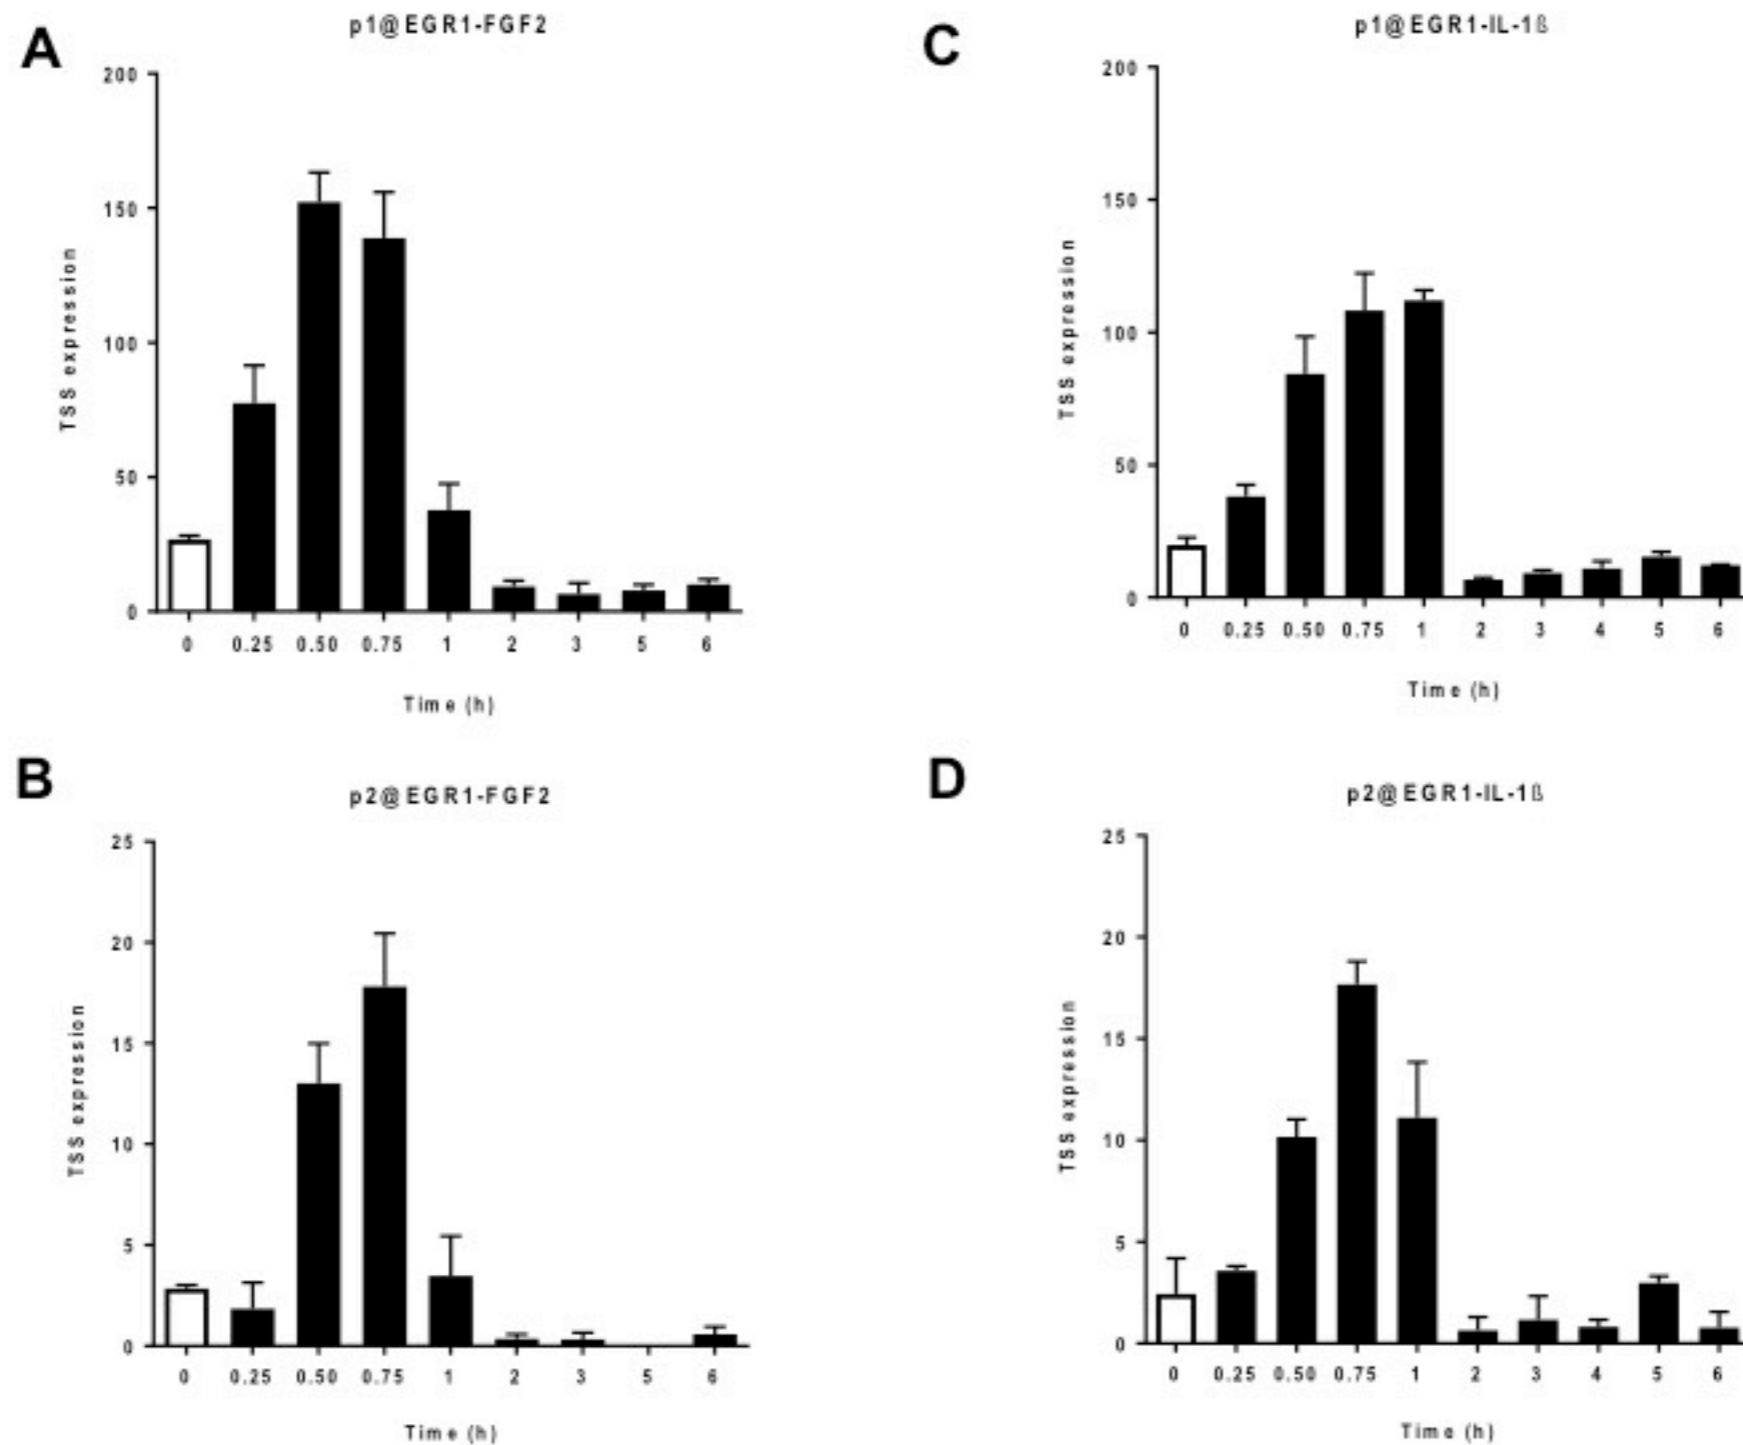

Supplement: 41598_2018_30702_MOESM1_ESM.pdf [file 41598_2018_30702_MOESM1_ESM.pdf]
